# Supplementary material
Source: PubMed Central journal article supplement (PMC3610444)
Supplement: Supp_Figure1.pdf [file Supp_Figure1.pdf]

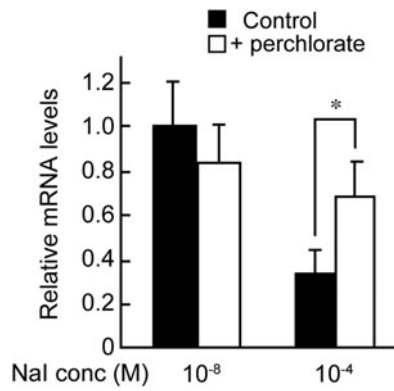

**SUPPLEMENTARY FIG. S1.** Perchlorate prevented high dose iodide from decreasing *Slc5A5* mRNA suppression in FRTL-5 cells. FRTL-5 cells were cultured in medium containing bovine TSH ( $30 \mu\text{U}/\text{mL}$ ) and a low ( $10^{-8}$  M) or high ( $10^{-4}$  M) iodide concentration with or without perchlorate ( $10 \mu\text{M}$ ). After an additional 72 h of culture, total RNA was isolated, and the mRNA expression level of *Slc5a5* was analyzed by real-time polymerase chain reaction. Results are expressed relative to mRNA levels found in FRTL-5 cells treated with  $10^{-8}$  M NaI. Data are means  $\pm$  SD of four samples.  $*p \leq 0.05$  compared with the control.
