# Supplementary material
Source: PubMed Central journal article supplement (PMC3610444)
Supplement: Supp_Table1.pdf [file Supp_Table1.pdf]

## Supplementary Data

SUPPLEMENTARY TABLE S1. POLYMERASE CHAIN REACTION PRIMER SEQUENCES

| <i>Gene name</i>      | <i>Forward primer (5'-3')</i> | <i>Reverse primer (5'-3')</i>     | <i>Length (bp)</i> |
|-----------------------|-------------------------------|-----------------------------------|--------------------|
| Human <i>TLR1</i>     | CAT AAC TCT GCT GAT CGT CAC C | TGC TAG GAA TGG AGT ACT GCG       | 491                |
| Human <i>TLR2</i>     | GAT GAC TCT ACC AGA TGC CT    | CAG AAG AAT GAG AAT GGC AGC       | 745                |
| Human <i>TLR3</i>     | CTC AGA AGA TTA CCA GCC CGC   | TTC TAG TTG TGG AAG CCA AGC       | 717                |
| Human <i>TLR4</i>     | TTA CCT GTG TGA CTC TCC ATC C | CAG AAG AAT GAG AAT GGC AGC       | 529                |
| Human <i>TLR5</i>     | CCT TGA CTA TTG ACA AGG AGG C | TTG TAG GCA AGG TTC AGA ACC       | 718                |
| Human <i>TLR6</i>     | TCT CAT GAC GAA GGA TAT GCC   | CGA TCA GCA GAG TTA TGT TGC       | 578                |
| Human <i>TLR7</i>     | ACG AAC ACC ACG AAC CTC AC    | GGC ACA TGC TGA AGA GAG TTA C     | 725                |
| Human <i>TLR8</i>     | TGG CTT GAA TAT CAC AGA CGG   | ACC AGG CAG CAT TAA TCT TCC       | 584                |
| Human <i>TLR9</i>     | CAA CAA CCT CAC TGT GGT GC    | GAG TGA GCG GAA GAA GAT GC        | 514                |
| Human <i>TLR10</i>    | GAA CTG ATG ACC AAC TGC TCC   | GAA GTC TTG ATT CCA TCA CGC       | 557                |
| Rat <i>Tlr1</i>       | TCT CTA AGG TAC AGT GAT GC GG | TGT TCT CCA CAA TGC TCT TGC       | 823                |
| Rat <i>Tlr2</i>       | AGC TGT TGC GTT ACA TCT TGG   | TGA AGG ACA GGA GTT CAC AGG       | 822                |
| Rat <i>Tlr3</i>       | AGC ATC CAG AAT CTC TCT CTG G | AGA TGT GGA GGA GGT GAG ACA GACC  | 955                |
| Rat <i>Tlr4</i>       | AGT TGG CTC TGC CAA GTC TC    | AAG CAC ACT GAC CAC CGA TAC       | 821                |
| Rat <i>Tlr5</i>       | CAT AGG CGT GGT CTT CAT GG    | TTG TAG CAC CGA ACT CCT GG        | 853                |
| Rat <i>Tlr6</i>       | TGC TCA CAC TGT CAG ACA CG    | TCC TCT GCA GTT CCT CTA AGG       | 912                |
| Rat <i>Tlr7</i>       | ACC GAA TCT AAC GAC TCT CTC C | TGC TGA GCT GTA TGC TCT GG        | 830                |
| Rat <i>Tlr8</i>       | CAA ACA ACA GCA CCC AAA TG    | GCT ATG CGA TTT CCC GAT AA        | 984                |
| Rat <i>Tlr9</i>       | ACT GCA AGA AGG TAT CGT TCG   | GTA ACC TGG ACA GAT TGG CC        | 702                |
| Rat <i>Tlr10</i>      | TGA TCC TGT GCC ATA ACA GC    | AAG AGT CTC CAG TTG GTT GCC       | 932                |
| Rat <i>Ifnb1</i>      | ACA TTG CGT TCC TGC TGT GC    | GCT CTT CAA GCC TAA AGT AGT CGT G | 404                |
| Rat <i>Il6</i>        | TTC CAG CCA GTT GCC TTC TTG G | GGC ATA GCA CAC TAG GTT TGC C     | 623                |
| Rat <i>Tnfa</i>       | TCT CAT CAG TTC CAT GGC C     | TGA CTT TCT CCT GGT ATG AAA TGG   | 302                |
| Rat <i>Ccl2</i>       | TAG CAT CCA CGT GCT GTC TC    | TGA GGT GGT TGT GGA AAA GA        | 358                |
| Rat <i>Cxcl10</i>     | TCC GCA TGT TGA GAT CAT TGC C | TTT GCC ATC TCA CCT GGA CTG C     | 541                |
| Mouse <i>Ifnb1</i>    | CCC TAT GGA GAT GAC GGA GA    | ACC CAG TGC TGG AGA AAT TG        | 110                |
| Mouse <i>Cxcl10</i>   | GAA ATC ATC CCT GCG AGC CT    | TTG ATG GTC TTA GAT TCC GGA TTC   | 123                |
| Mouse <i>Ccl2</i>     | TTC ACA GTT GCC GGC TGG       | TGA ATG AGT AGC AGC AGG TGA GTG   | 81                 |
| Mouse <i>H2-D1</i>    | CCT CCT CCG TCC ACT GAC TC    | CTG GAG CCA GAG CAT AGT C         | 148                |
| Universal <i>Actb</i> | AGC CAT GTA CGT AGC CAT CC    | TGT GGT GGT GAA GCT GTA GC        | 220                |
| <i>Gene name</i>      | <i>Probe ID</i>               |                                   |                    |
| Human 18S rRNA        | Hs99999901_s1                 |                                   |                    |
| Human <i>SLC5A5</i>   | Hs00166567_m1                 |                                   |                    |
| Human <i>TGFB1</i>    | Hs00171257_m1                 |                                   |                    |
| Human <i>ANXA1</i>    | Hs00945401_m1                 |                                   |                    |
| Human <i>IL6</i>      | Hs00174131_m1                 |                                   |                    |
