# Supplementary material
Source: PubMed Central journal article supplement (PMC3610444)
Supplement: Supp_Table3.pdf [file Supp_Table3.pdf]

SUPPLEMENTARY TABLE S3. EFFECT OF IODIDE ON GENES INVOLVED IN THYROID HORMONOGENESIS  
AFTER 6 H OF INCUBATION OF HUMAN THYROID FOLLICLES

| <i>Gene name</i> | <i>Description</i>                                                                                         | <i>Fold change</i> |
|------------------|------------------------------------------------------------------------------------------------------------|--------------------|
| TG               | <i>Homo sapiens</i> thyroglobulin (TG), mRNA [NM_003235]                                                   | 0.79               |
| TSHR             | <i>Homo sapiens</i> thyroid stimulating hormone receptor (TSHR), transcript variant 1, mRNA [NM_000369]    | 1.00               |
| TPO              | <i>Homo sapiens</i> thyroid peroxidase (TPO), transcript variant 1, mRNA [NM_000547]                       | 1.18               |
| SLC5A5           | <i>Homo sapiens</i> solute carrier family 5 (sodium iodide symporter), member 5 (SLC5A5), mRNA [NM_000453] | 0.87               |
| SLC26A4          | <i>Homo sapiens</i> solute carrier family 26, member 4 (SLC26A4) (pendrin), mRNA [NM_000441]               | 1.10               |
| DIO1             | <i>Homo sapiens</i> deiodinase, iodothyronine, type I (DIO1), transcript variant 1, mRNA [NM_000792]       | 0.88               |
| DIO2             | <i>Homo sapiens</i> deiodinase, iodothyronine, type II (DIO2), transcript variant 1, mRNA [NM_013989]      | 1.08               |
| DUOX1            | <i>Homo sapiens</i> dual oxidase 1 (DUOX1), transcript variant 1, mRNA [NM_017434]                         | 0.96               |
| DUOX2            | <i>Homo sapiens</i> dual oxidase 2 (DUOX2), mRNA [NM_014080]                                               | 0.99               |
| TITF1            | <i>Homo sapiens</i> thyroid transcription factor 1 (TITF1), transcript variant 2, mRNA [NM_003317]         | 1.08               |
| FOXE1            | <i>Homo sapiens</i> forkhead box E1 (thyroid transcription factor 2) (FOXE1), mRNA [NM_004473]             | 1.09               |
| PAX8             | <i>Homo sapiens</i> paired box gene 8 (PAX8), transcript variant PAX8A, mRNA [NM_003466]                   | 0.85               |
